# Supplementary material for: Structural studies of high dispersion H3PW12O40/SiO2 solid acid catalysts
Source: Royal Society of Chemistry journal article supplement (doi:10.1039/b603979k), 2006-01-01
Supplement: b603979k.pdf [file b603979k.pdf]

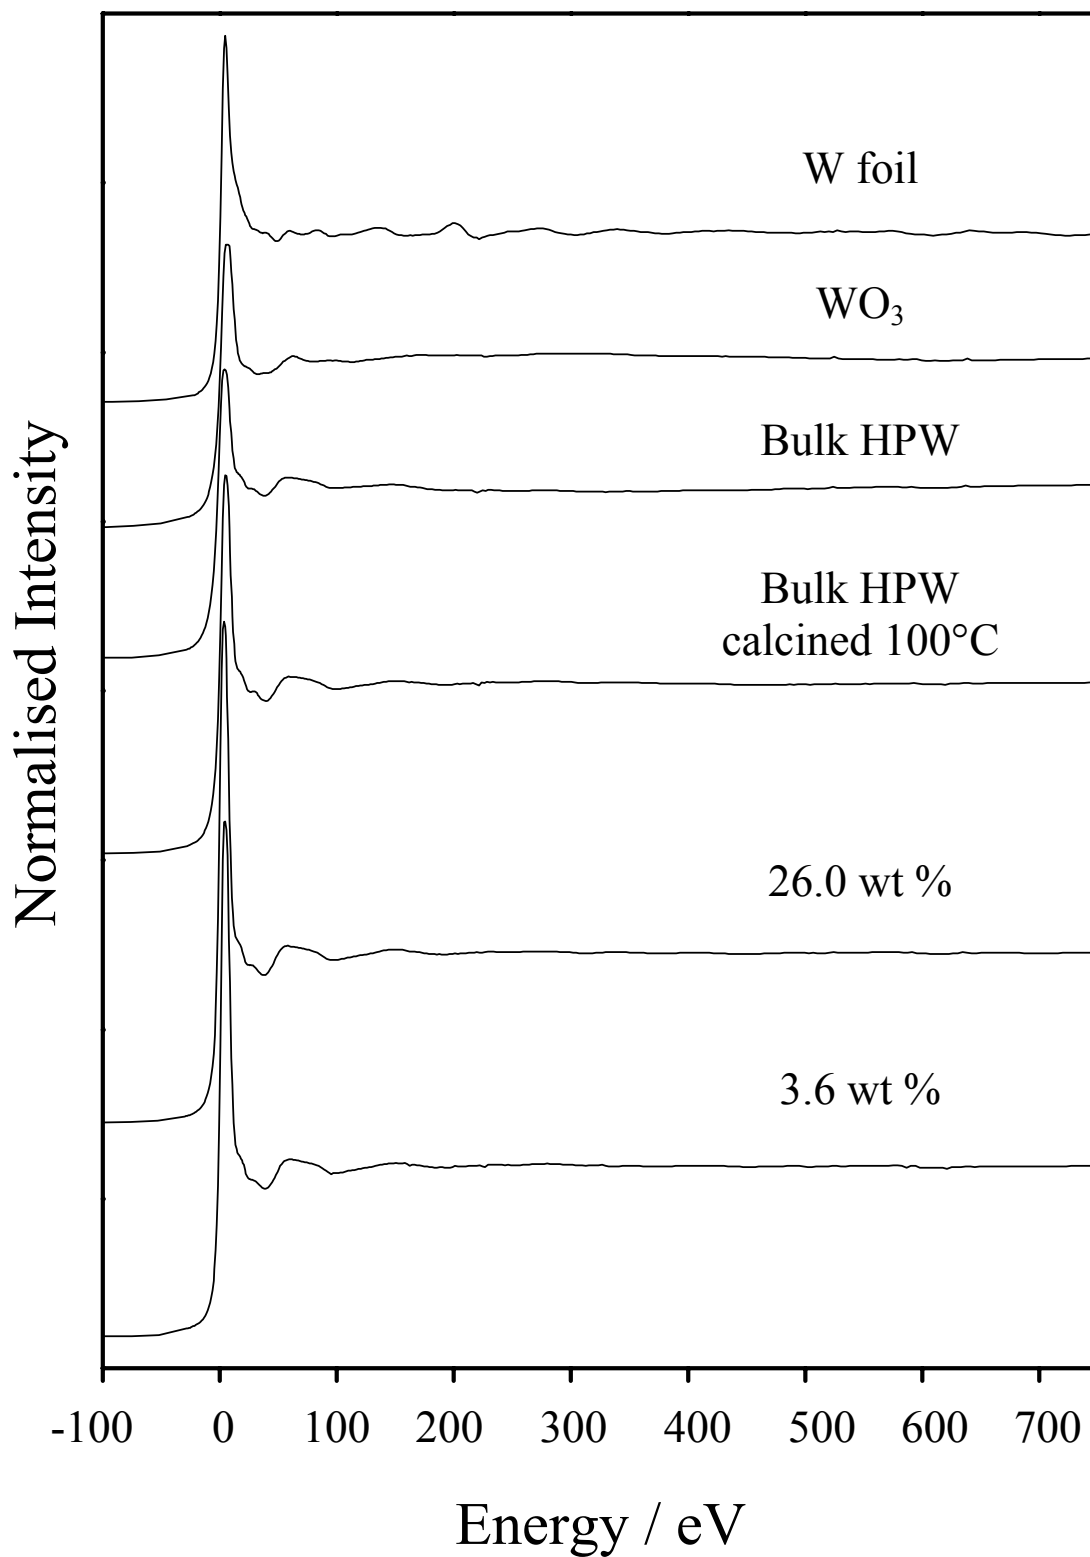

**Figure S1:** Raw EXAFS data for supported HPW and reference samples

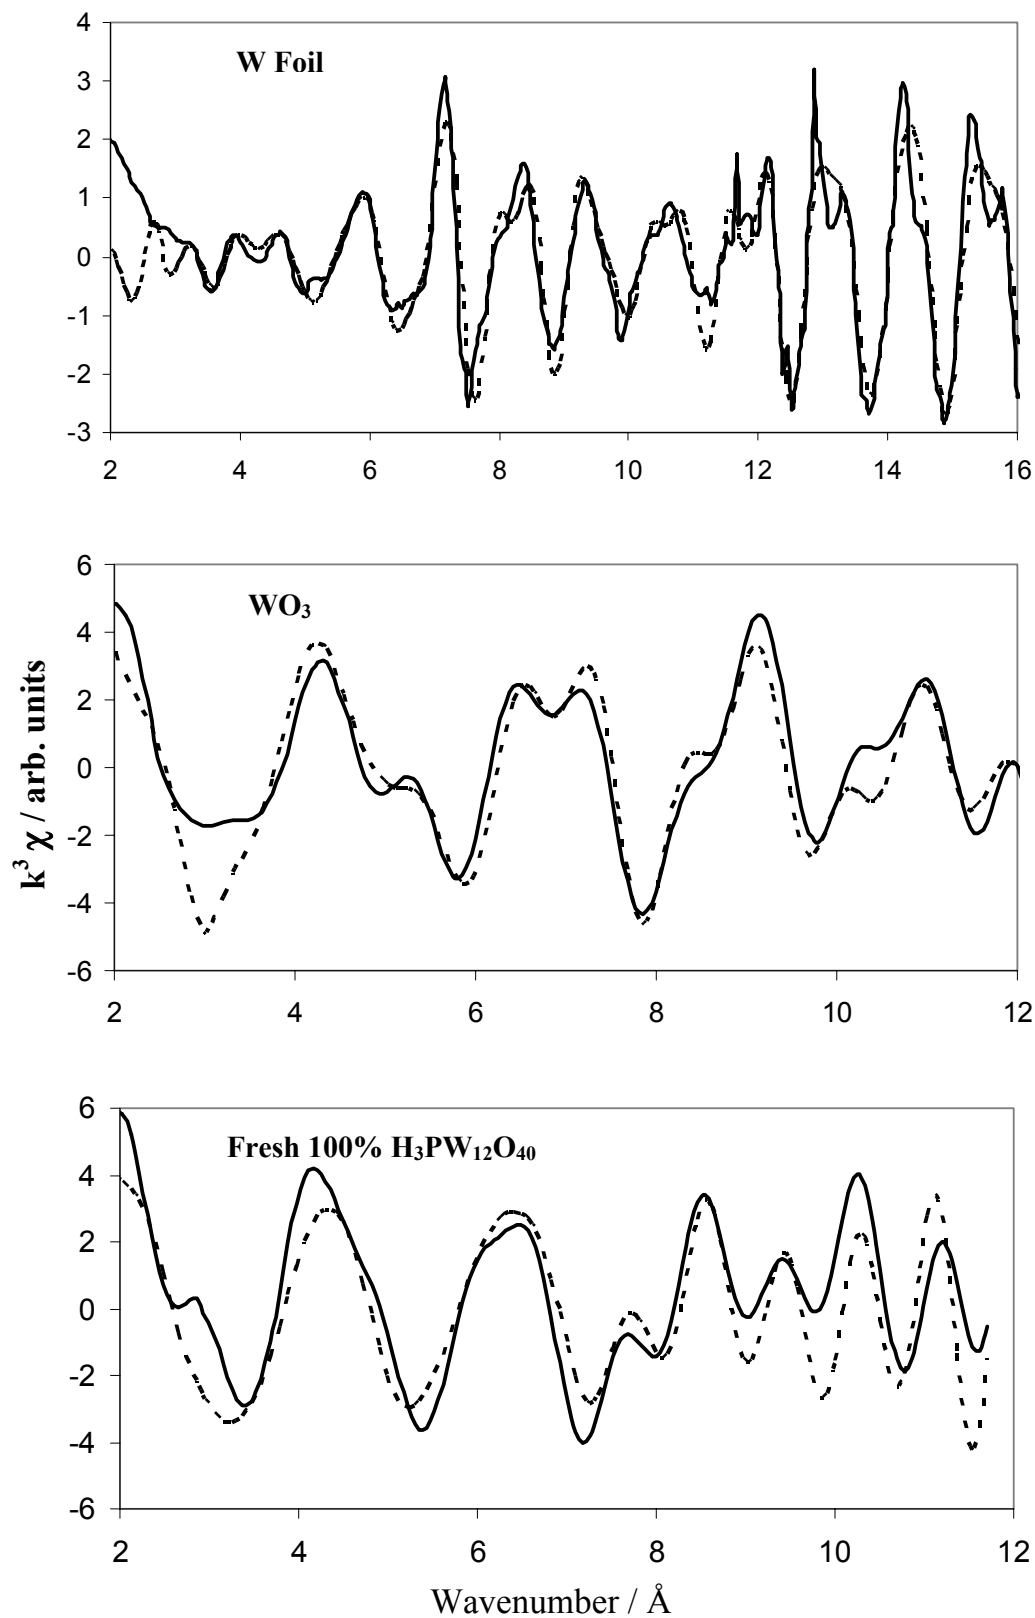

**Figure S2:** Raw EXAFS data for bulk HPW and reference samples
